# Supplementary material for: Performance of the Safer Nursing Care Tool to measure nurse staffing requirements in acute hospitals: a multicentre observational study
Source: HighWire-hosted journal article supplement (doi:10.1136/bmjopen-2019-035828), 2020-05-01
Supplement: bmjopen-2019-035828supp001_data_supplement.pdf [file bmjopen-2019-035828supp001_data_supplement.pdf]

Supplementary material to accompany article: Griffiths P, Saville C, Ball J, Culliford D, Pattison N and Monks T. Performance of the Safer Nursing Care Tool to measure nurse staffing requirements in acute hospitals: a multi-centre observational study. *BMJ Open* 2020. <https://doi.org/bmjopen-2019-035828>

## Supplementary tables

Table 1 Association between staffing shortfall and nurse perceptions of staffing adequacy: test for non-linear staffing effects in multivariable models.

| Variable                                     | Enough staff for quality |                         |         | Nursing care left undone |                         |         | Staff breaks missed |                         |         |
|----------------------------------------------|--------------------------|-------------------------|---------|--------------------------|-------------------------|---------|---------------------|-------------------------|---------|
|                                              | Adjusted OR              | 95% confidence interval | p-value | Adjusted OR              | 95% confidence interval | p-value | Adjusted OR         | 95% confidence interval | p-value |
| Registered nurse shortfall (HPPD)            | 0.89                     | [0.86, 0.92]            | <0.001  | 1.15                     | [1.09, 1.21]            | <0.001  | 1.13                | [1.08, 1.19]            | <0.001  |
| Nursing support worker shortfall (HPPD)      | 0.85                     | [0.83, 0.88]            | <0.001  | 1.15                     | [1.08, 1.22]            | <0.001  | 1.12                | [1.06, 1.19]            | <0.001  |
| Registered nurse shortfall squared           | 1.00                     | [0.99, 1.00]            | 0.469   | 1.01                     | [1.00, 1.02]            | 0.021   | 1.00                | [0.99, 1.02]            | 0.533   |
| Nursing support worker shortfall squared     | 1.01                     | [1.00, 1.02]            | 0.102   | 0.99                     | [0.97, 1.01]            | 0.194   | 0.99                | [0.97, 1.01]            | 0.165   |
| Day of week- Monday (reference)              |                          |                         |         |                          |                         |         |                     |                         |         |
| Tuesday                                      |                          |                         |         |                          |                         |         | 0.71                | [0.58, 0.88]            | 0.002   |
| Wednesday                                    |                          |                         |         |                          |                         |         | 0.61                | [0.49, 0.75]            | <0.001  |
| Thursday                                     |                          |                         |         |                          |                         |         | 0.82                | [0.66, 1.00]            | 0.053   |
| Friday                                       |                          |                         |         |                          |                         |         | 0.80                | [0.65, 0.99]            | 0.042   |
| Saturday                                     |                          |                         |         |                          |                         |         | 0.49                | [0.39, 0.62]            | <0.001  |
| Sunday                                       |                          |                         |         |                          |                         |         | 0.80                | [0.65, 0.98]            | 0.031   |
| Ward type- other (reference)                 |                          |                         |         |                          |                         |         |                     |                         |         |
| Surgical                                     | 0.57                     | [0.33, 0.96]            | 0.036   | 1.98                     | [1.10, 3.54]            | 0.022   | 2.07                | [1.18, 3.63]            | 0.011   |
| Proportion single rooms                      |                          |                         |         |                          |                         |         |                     |                         |         |
| Variance partition coefficient for units     | 0.22                     |                         |         | 0.21                     |                         |         | 0.23                |                         |         |
| Variance partition coefficient for hospitals | 0.15                     |                         |         | 0.20                     |                         |         | 0.13                |                         |         |
| Akaike information criterion                 | 20715                    |                         |         | 8378                     |                         |         | 8097                |                         |         |
| Bayesian information criterion               | 20779                    |                         |         | 8442                     |                         |         | 8209                |                         |         |

Supplementary material to accompany article: Griffiths P, Saville C, Ball J, Culliford D, Pattison N and Monks T. Performance of the Safer Nursing Care Tool to measure nurse staffing requirements in acute hospitals: a multi-centre observational study. *BMJ Open* 2020. <https://doi.org/bmjopen-2019-035828>

Table 2 Association between staffing shortfall and nurse perceptions of staffing adequacy: test for interactions between significant variables in multivariable models

| Variable                                                      | Enough staff for quality |                         |         | Nursing care left undone |                         |         | Staff breaks Missed |                         |         |
|---------------------------------------------------------------|--------------------------|-------------------------|---------|--------------------------|-------------------------|---------|---------------------|-------------------------|---------|
|                                                               | Adjusted OR              | 95% confidence interval | p-value | Adjusted OR              | 95% confidence interval | p-value | Adjusted OR         | 95% confidence interval | p-value |
| Registered nurse shortfall (HPPD)                             | 0.92                     | [0.89, 0.95]            | <0.001  | 1.14                     | [1.07, 1.21]            | <0.001  | 1.13                | [1.02, 1.25]            | 0.019   |
| Nursing support worker shortfall (HPPD)                       | 0.87                     | [0.84, 0.90]            | <0.001  | 1.14                     | [1.06, 1.22]            | <0.001  | 1.13                | [1.00, 1.28]            | 0.049   |
| Registered nurse shortfall squared (HPPD)                     |                          |                         |         | 1.01                     | [1.00, 1.02]            | 0.044   |                     |                         |         |
| Day of week- Monday (reference)                               |                          |                         |         |                          |                         |         |                     |                         |         |
| Tuesday                                                       |                          |                         |         |                          |                         |         | 0.71                | [0.57, 0.90]            | 0.005   |
| Wednesday                                                     |                          |                         |         |                          |                         |         | 0.60                | [0.47, 0.76]            | <0.001  |
| Thursday                                                      |                          |                         |         |                          |                         |         | 0.84                | [0.67, 1.05]            | 0.135   |
| Friday                                                        |                          |                         |         |                          |                         |         | 0.87                | [0.69, 1.09]            | 0.225   |
| Saturday                                                      |                          |                         |         |                          |                         |         | 0.50                | [0.38, 0.65]            | <0.001  |
| Sunday                                                        |                          |                         |         |                          |                         |         | 0.81                | [0.64, 1.01]            | 0.064   |
| Unit type- Other (reference)                                  |                          |                         |         |                          |                         |         |                     |                         |         |
| Surgical                                                      | 0.63                     | [0.37, 1.08]            | 0.096   | 2.03                     | [1.11, 3.69]            | 0.021   | 2.04                | [1.15, 3.63]            | 0.015   |
| Proportion single rooms                                       |                          |                         |         |                          |                         |         |                     |                         |         |
| Turnover (per nursing hour)                                   |                          |                         |         |                          |                         |         |                     |                         |         |
| Registered nurse shortfall : Nursing support worker shortfall | 0.99                     | [0.98, 1.01]            | 0.315   | 1.00                     | [0.98, 1.02]            | 0.972   | 1.01                | [0.99, 1.03]            | 0.202   |
| Registered nurse shortfall : Tuesday                          |                          |                         |         |                          |                         |         | 0.98                | [0.86, 1.11]            | 0.708   |
| Registered nurse shortfall : Wednesday                        |                          |                         |         |                          |                         |         | 0.99                | [0.86, 1.13]            | 0.840   |
| Registered nurse shortfall : Thursday                         |                          |                         |         |                          |                         |         | 0.96                | [0.84, 1.09]            | 0.540   |
| Registered nurse shortfall : Friday                           |                          |                         |         |                          |                         |         | 0.94                | [0.82, 1.07]            | 0.332   |
| Registered nurse shortfall : Saturday                         |                          |                         |         |                          |                         |         | 1.05                | [0.89, 1.24]            | 0.558   |
| Registered nurse shortfall : Sunday                           |                          |                         |         |                          |                         |         | 1.04                | [0.91, 1.20]            | 0.566   |
| Registered nurse shortfall : Surgical unit                    | 0.88                     | [0.82, 0.95]            | 0.001   | 1.00                     | [0.89, 1.13]            | 0.952   | 1.00                | [0.89, 1.12]            | 0.961   |

Supplementary material to accompany article: Griffiths P, Saville C, Ball J, Culliford D, Pattison N and Monks T. Performance of the Safer Nursing Care Tool to measure nurse staffing requirements in acute hospitals: a multi-centre observational study. *BMJ Open* 2020. <https://doi.org/bmjopen-2019-035828>

|                                                              |       |              |       |      |              |       |      |              |       |
|--------------------------------------------------------------|-------|--------------|-------|------|--------------|-------|------|--------------|-------|
| Registered nurse shortfall:<br>Proportion single rooms       |       |              |       |      |              |       |      |              |       |
| Nursing support worker shortfall:<br>Tuesday                 |       |              |       |      |              |       | 1.01 | [0.85, 1.20] | 0.905 |
| Nursing support worker shortfall:<br>Wed                     |       |              |       |      |              |       | 1.04 | [0.87, 1.24] | 0.694 |
| Nursing support worker shortfall:<br>Thursday                |       |              |       |      |              |       | 0.95 | [0.81, 1.11] | 0.536 |
| Nursing support worker shortfall:<br>Friday                  |       |              |       |      |              |       | 0.87 | [0.74, 1.02] | 0.097 |
| Nursing support worker shortfall:<br>Saturday                |       |              |       |      |              |       | 0.92 | [0.76, 1.11] | 0.390 |
| Nursing support worker shortfall:<br>Sunday                  |       |              |       |      |              |       | 0.95 | [0.80, 1.12] | 0.522 |
| Nursing support worker shortfall:<br>Surgical unit           | 0.95  | [0.88, 1.04] | 0.263 | 0.98 | [0.86, 1.11] | 0.766 | 1.07 | [0.94, 1.21] | 0.325 |
| Nursing support worker shortfall:<br>Proportion single rooms |       |              |       |      |              |       |      |              |       |
| Variance partition coefficient for<br>units                  | 0.22  |              |       | 0.21 |              |       | 0.23 |              |       |
| Variance partition coefficient for<br>hospitals              | 0.14  |              |       | 0.20 |              |       | 0.13 |              |       |
| Akaike information criterion                                 | 20708 |              |       | 8384 |              |       | 8116 |              |       |
| Bayesian information criterion                               | 20780 |              |       | 8464 |              |       | 8341 |              |       |

Supplementary material to accompany article: Griffiths P, Saville C, Ball J, Culliford D, Pattison N and Monks T. Performance of the Safer Nursing Care Tool to measure nurse staffing requirements in acute hospitals: a multi-centre observational study. *BMJ Open* 2020. <https://doi.org/bmjopen-2019-035828>

Table 3: Association between overall (registered nurse and assistant) shortfall and nurse perceptions of staffing adequacy

| Variable                                      | Enough staff for quality |                         |              | Nursing care left undone |                         |              | Staff breaks missed |                         |              |
|-----------------------------------------------|--------------------------|-------------------------|--------------|--------------------------|-------------------------|--------------|---------------------|-------------------------|--------------|
|                                               | Adjusted OR              | 95% confidence interval | p-value      | Adjusted OR              | 95% confidence interval | p-value      | Adjusted OR         | 95% confidence interval | p-value      |
| Overall shortfall (HPPD)                      | 0.88                     | [0.86, 0.90]            | <0.001       | 1.14                     | [1.09, 1.19]            | <0.001       | 1.11                | [1.07, 1.16]            | <0.001       |
| Skill mix (registered nurse HPPD/ total HPPD) | 0.81                     | [0.62, 1.06]            | 0.117        | 0.74                     | [0.47, 1.17]            | 0.195        | 0.88                | [0.57, 1.38]            | 0.586        |
| Patient turnover (per care hour)              | 0.91                     | [0.30, 2.77]            | 0.869        | 3.51                     | [0.63, 19.65]           | 0.153        | 4.99                | [0.96, 26.02]           | 0.057        |
| Unit type- other (reference)                  |                          |                         |              |                          |                         |              |                     |                         |              |
| Surgical                                      | 0.54                     | [0.31, 0.93]            | <b>0.025</b> | 2.14                     | [1.20, 3.83]            | <b>0.010</b> | 2.16                | [1.23, 3.80]            | <b>0.007</b> |
| Proportion single rooms                       | 0.53                     | [0.17, 1.64]            | 0.271        | 3.01                     | [0.93, 9.69]            | 0.065        | 2.06                | [0.65, 6.57]            | 0.222        |
| Day of week- Monday (reference)               |                          |                         |              |                          |                         |              |                     |                         |              |
| Tuesday                                       | 1.12                     | [0.99, 1.26]            | 0.078        | 0.86                     | [0.69, 1.06]            | 0.159        | 0.71                | [0.58, 0.88]            | <b>0.001</b> |
| Wednesday                                     | 1.28                     | [1.13, 1.45]            | <0.001       | 0.96                     | [0.77, 1.18]            | 0.676        | 0.61                | [0.49, 0.76]            | <0.001       |
| Thursday                                      | 1.09                     | [0.96, 1.23]            | 0.195        | 0.91                     | [0.73, 1.13]            | 0.379        | 0.81                | [0.66, 1.00]            | <b>0.045</b> |
| Friday                                        | 1.03                     | [0.91, 1.17]            | 0.604        | 0.92                     | [0.74, 1.15]            | 0.481        | 0.79                | [0.64, 0.97]            | <b>0.028</b> |
| Saturday                                      | 1.30                     | [1.14, 1.48]            | <0.001       | 0.75                     | [0.60, 0.95]            | 0.016        | 0.50                | [0.40, 0.64]            | <0.001       |
| Sunday                                        | 1.02                     | [0.90, 1.15]            | 0.795        | 1.11                     | [0.90, 1.37]            | 0.316        | 0.82                | [0.66, 1.01]            | 0.058        |
| Variance partition coefficient for units      | 0.22                     |                         |              | 0.22                     |                         |              | 0.23                |                         |              |
| Variance partition coefficient for hospitals  | 0.12                     |                         |              | 0.17                     |                         |              | 0.11                |                         |              |
| Akaike information criterion                  | 20700                    |                         |              | 8376                     |                         |              | 8094                |                         |              |
| Bayesian information criterion                | 20812                    |                         |              | 8488                     |                         |              | 8206                |                         |              |

Supplementary material to accompany article: Griffiths P, Saville C, Ball J, Culliford D, Pattison N and Monks T. Performance of the Safer Nursing Care Tool to measure nurse staffing requirements in acute hospitals: a multi-centre observational study. *BMJ Open* 2020. <https://doi.org/bmjopen-2019-035828>

Table 4: Association between staffing shortfall and nurse perceptions of “enough staff for quality”: comparison of coefficients from models with full sample versus model excluding the hospital Trust where recoding occurred

| Variable                                | Model with full sample |                         |         | Model excluding 'hospital D' |                         |         |
|-----------------------------------------|------------------------|-------------------------|---------|------------------------------|-------------------------|---------|
|                                         | Adjusted OR            | 95% confidence interval | P-value | Adjusted OR                  | 95% confidence interval | P-value |
| Registered nurse shortfall (HPPD)       | 0.89                   | [0.87, 0.92]            | <0.001  | 0.89                         | [0.86, 0.91]            | <0.001  |
| Nursing support worker shortfall (HPPD) | 0.86                   | [0.83, 0.89]            | <0.001  | 0.84                         | [0.81, 0.87]            | <0.001  |
| Turnover (per care hour)                | 0.91                   | [0.30, 2.75]            | 0.863   | 0.83                         | [0.26, 2.63]            | 0.747   |
| Ward type – other (reference)           |                        |                         |         |                              |                         |         |
| Surgical                                | 0.54                   | [0.31, 0.92]            | 0.023   | 0.45                         | [0.27, 0.76]            | 0.003   |
| Proportion single rooms                 | 0.54                   | [0.18, 1.66]            | 0.283   | 0.61                         | [0.24, 1.57]            | 0.304   |
| Day of week- Monday (reference)         |                        |                         |         |                              |                         |         |
| Tuesday                                 | 1.12                   | [0.99, 1.26]            | 0.079   | 1.20                         | [1.05, 1.37]            | 0.008   |
| Wednesday                               | 1.28                   | [1.13, 1.45]            | <0.001  | 1.31                         | [1.15, 1.50]            | <0.001  |
| Thursday                                | 1.08                   | [0.96, 1.23]            | 0.2000  | 1.13                         | [0.99, 1.29]            | 0.071   |
| Friday                                  | 1.03                   | [0.91, 1.17]            | 0.610   | 1.08                         | [0.94, 1.24]            | 0.278   |
| Saturday                                | 1.29                   | [1.14, 1.47]            | <0.001  | 1.40                         | [1.21, 1.61]            | <0.001  |
| Sunday                                  | 1.02                   | [0.90, 1.15]            | 0.811   | 1.03                         | [0.90, 1.17]            | 0.697   |
